# Supplementary material for: An aggregation-induced emissive pyridoxal derived tetradentate Schiff base for the fluorescence turn-off sensing of copper(ii) in an aqueous medium
Source: Royal Society of Chemistry journal article supplement (doi:10.1039/d1nj05523b), 2022-01-01
Supplement: d1nj05523b1.pdf [file d1nj05523b1.pdf]

**Aggregation-induced emissive pyridoxal derived tetradentate Schiff base for the  
fluorescent turn-off sensing of copper(II) in aqueous medium**

**Vinita Bhardwaj<sup>a</sup>, Lavani Hindocha<sup>a</sup>, Ashok Kumar SK<sup>b</sup> and Suban K Sahoo<sup>a,\*</sup>**

<sup>a</sup>Department of Chemistry, Sardar Vallabhbhai National Institute Technology, Surat-395007,  
Gujarat, India.

<sup>b</sup>Materials Chemistry Division, School of Advanced Sciences, VIT University, Vellore-  
632014, India.

\*E-mail: [sks@chem.svnit.ac.in](mailto:sks@chem.svnit.ac.in), [subansahoo@gmail.com](mailto:subansahoo@gmail.com).

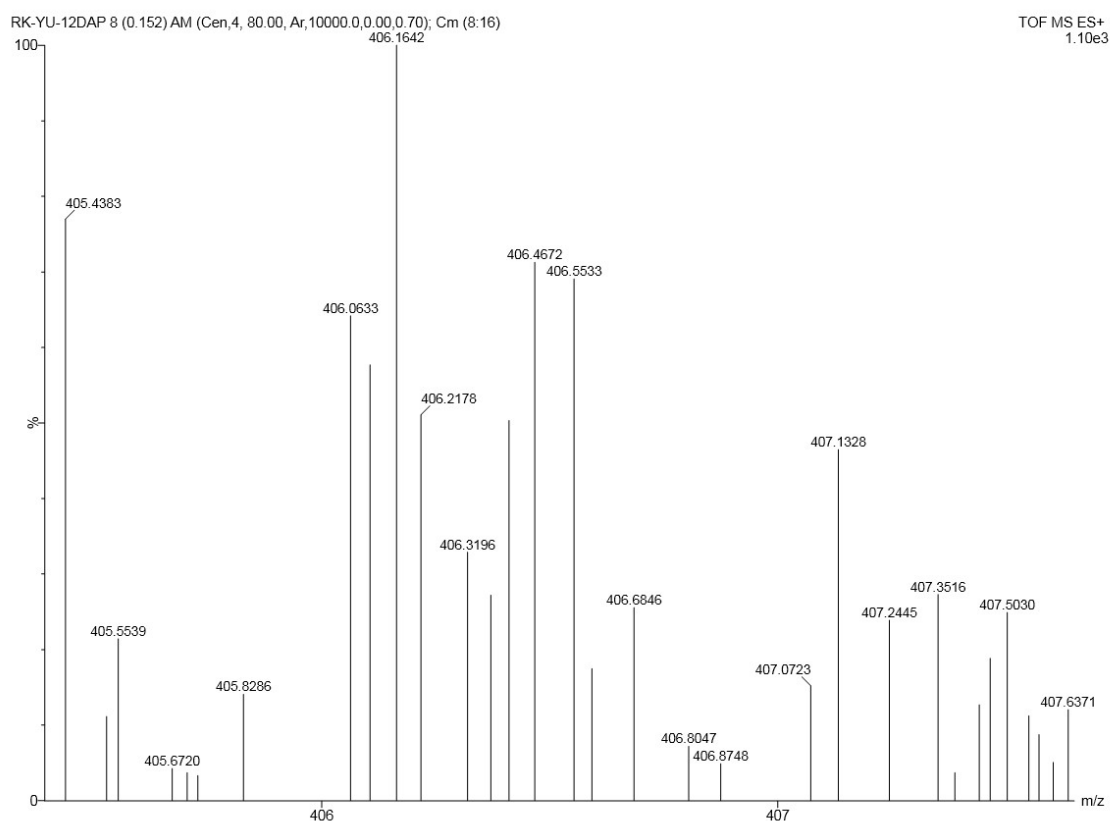

**Fig. S1.** HRMS of L.

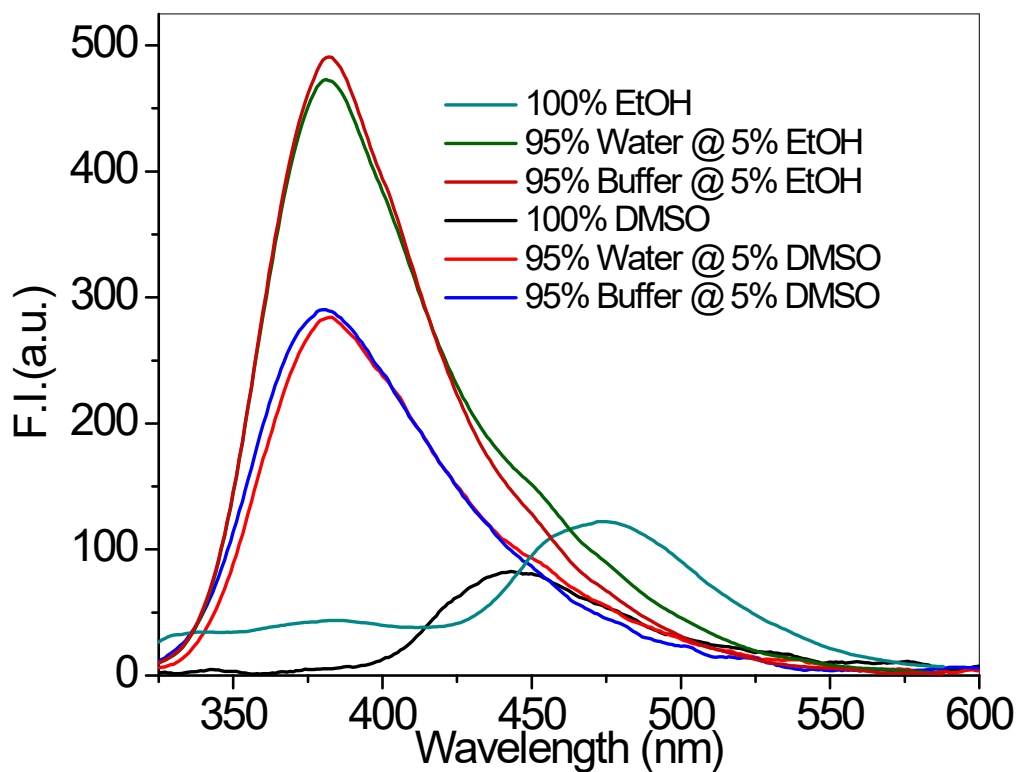

**Fig. S2.** The fluorescence spectral changes of **L** in pure EtOH/DMSO and EtOH/DMSO containing 95% water/HEPES buffer.

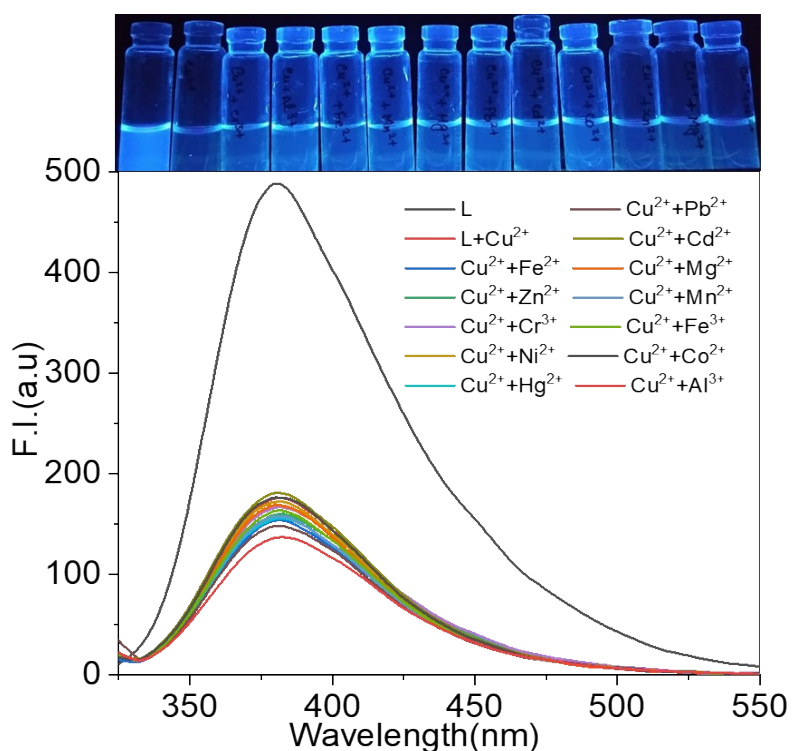

**Fig. S3.** The fluorescence spectral changes of **L** ( $5 \times 10^{-5}$  M) with  $\text{Cu}^{2+}$  ( $5 \times 10^{-5}$  M) in the presence of equimolar amount of other interfering metal ions (vials showed the corresponding fluorescent color changes irradiated with UV light at 365 nm).

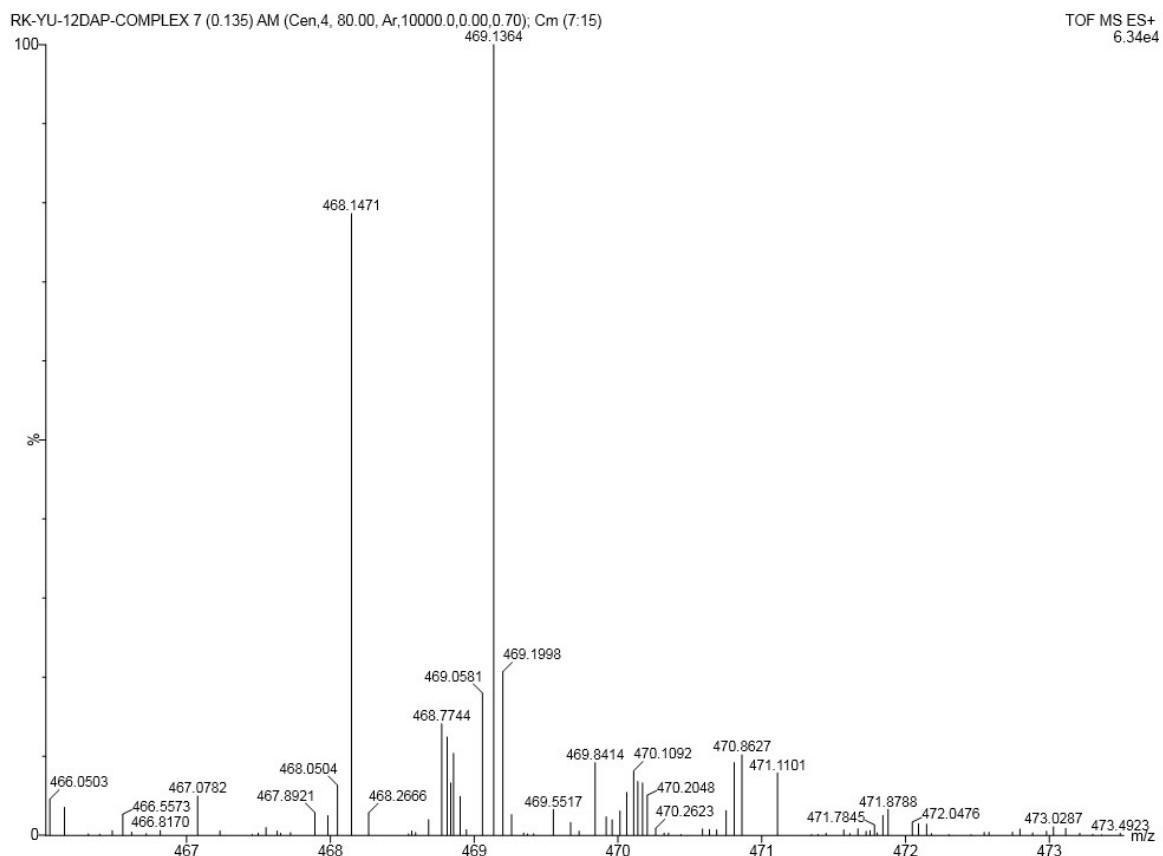

Fig. S4. HRMS of L-Cu<sup>2+</sup>.

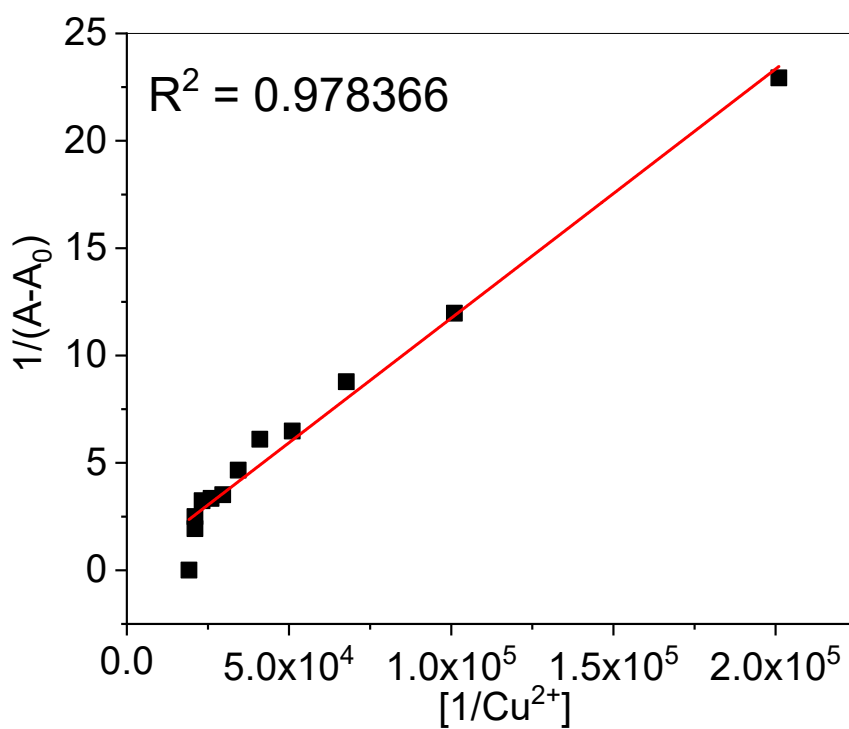

Fig. S5. B-H plot for the estimation of L-Cu<sup>2+</sup> binding constant by using UV-Vis titration data.

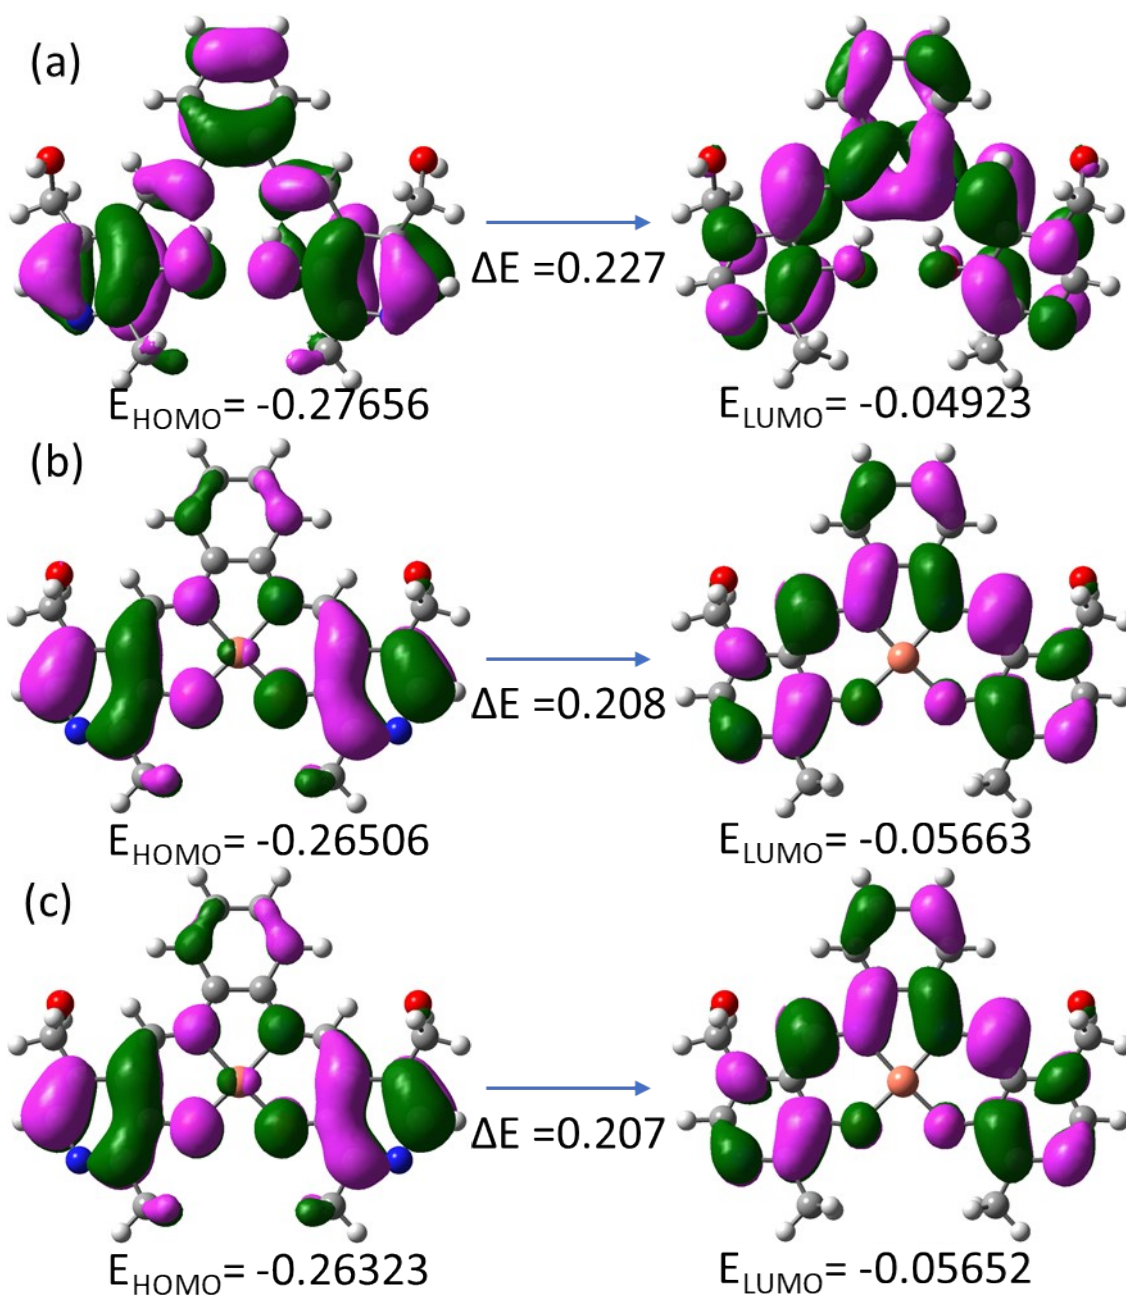

**Fig. S6.** DFT computed HOMO and LUMO diagrams of (a) L, (b) L-Cu<sup>2+</sup> (alpha MO's) and (c) L-Cu<sup>2+</sup> (beta MO's).

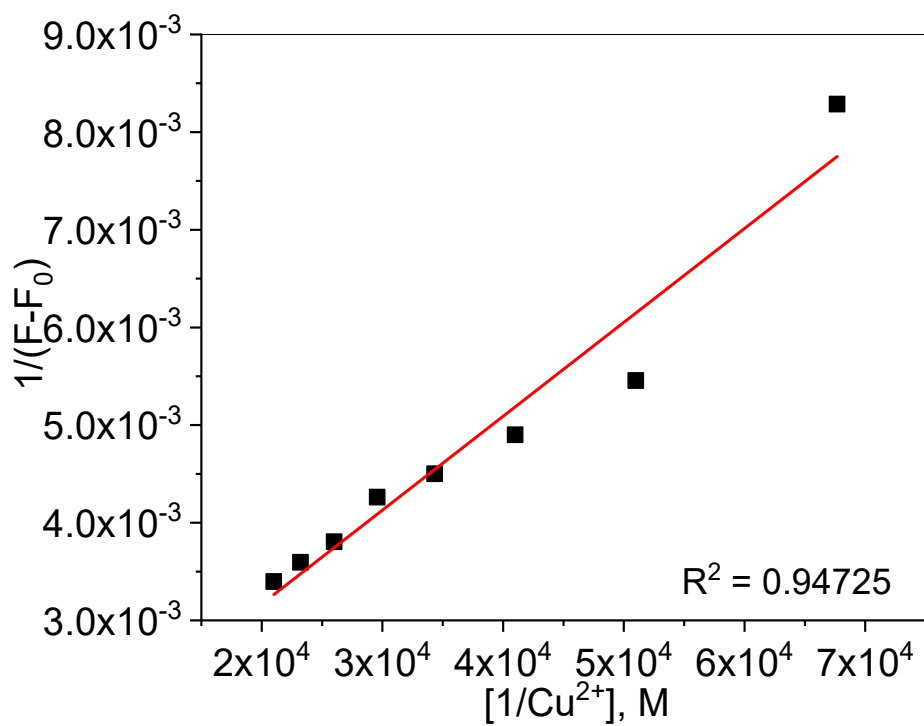

**Fig. S7.** B-H plot for the estimation of **L**- $Cu^{2+}$  binding constant by using fluorescence titration data.

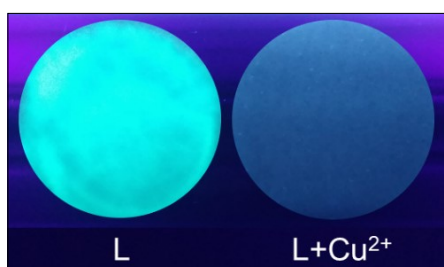

**Fig. S8.** Fluorometric test strips coated with **L** for the detection of  $Cu^{2+}$  ions under UV lamp at 365 nm.

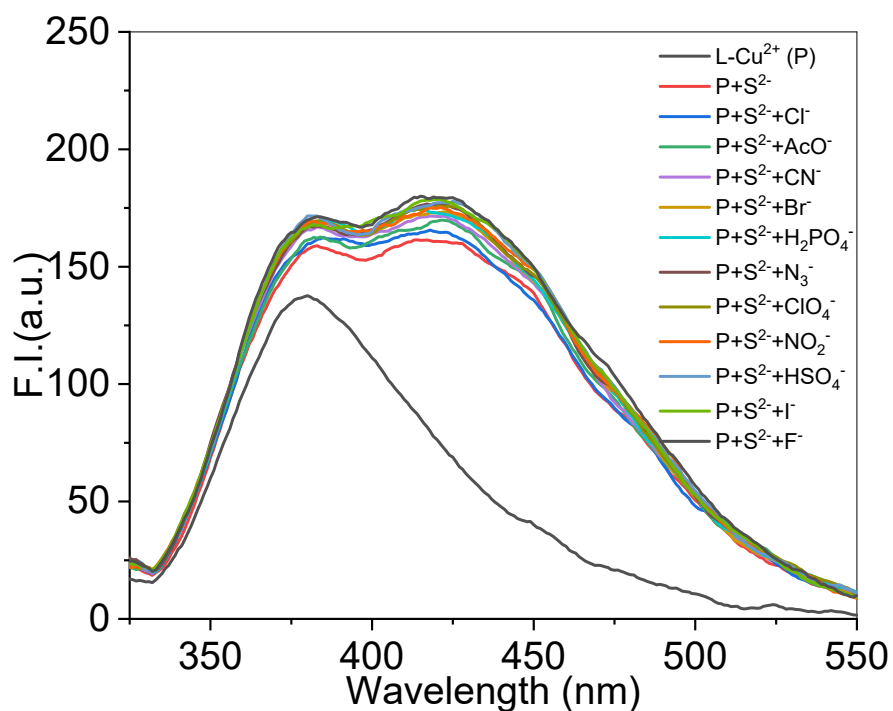

**Fig. S9.** The fluorescence spectral changes of L-Cu<sup>2+</sup> ( $5 \times 10^{-5}$  M) with S<sup>2-</sup> ( $5 \times 10^{-5}$  M) in the presence of equimolar amount of other interfering anions.

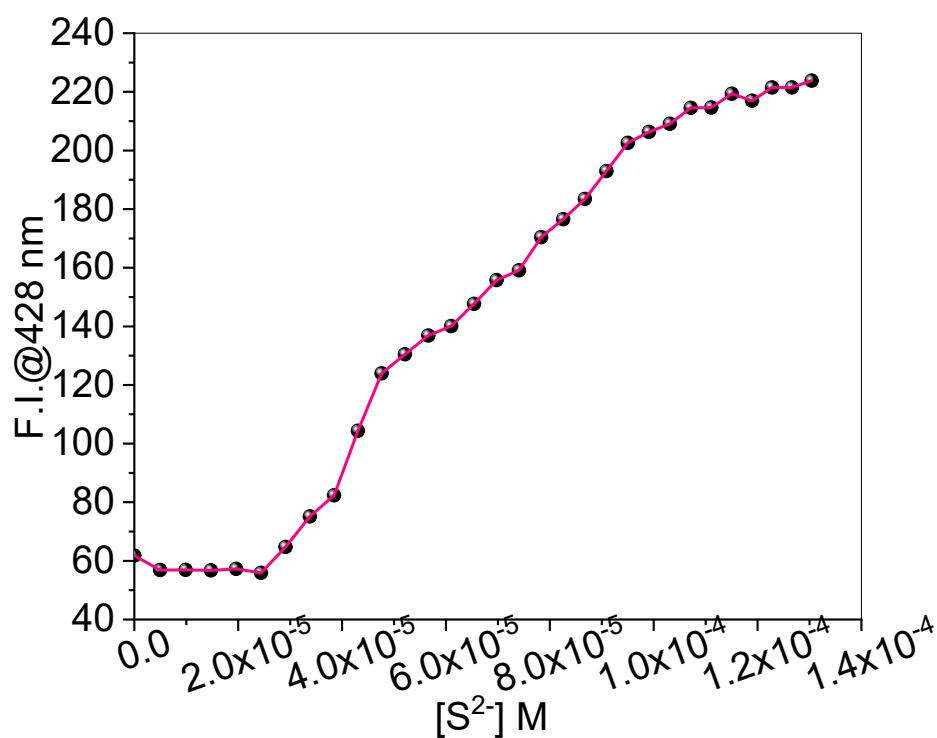

**Fig. S10.** The change in fluorescence intensity of L-Cu<sup>2+</sup> ( $5 \times 10^{-5}$  M,  $\lambda_{\text{exc}} = 300$  nm) at 428 nm with increasing amounts of S<sup>2-</sup> in EtOH:HEPES buffer (5% EtOH, pH = 7.4).

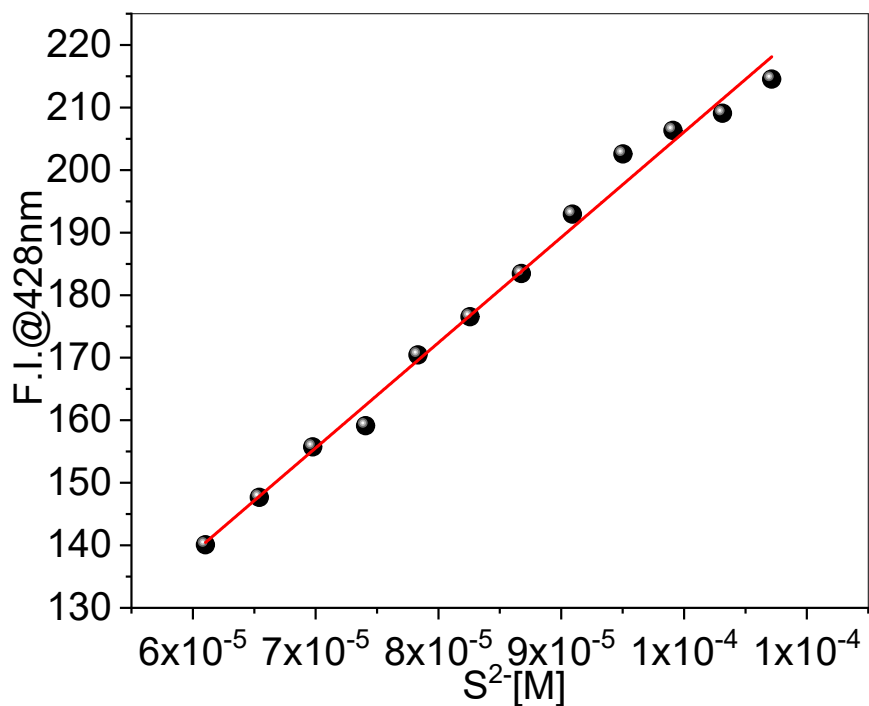

**Fig. S11.** The calibration plot for the estimation of LOD for  $S^{2-}$ .

**Table S1.** Comparison of **L** with reported fluorescent turn-off sensors.

| Sensors                                                                             | Medium                                           | $\lambda_{exc} / \lambda_{em}$ | LOD          | Ref. |
|-------------------------------------------------------------------------------------|--------------------------------------------------|--------------------------------|--------------|------|
| 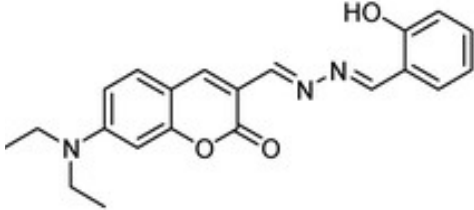 | MeOH-water<br>(v/v = 1 : 1, 10 mM HEPES, pH 7.0) | 467 nm/537 nm                  | 0.27 $\mu$ M | 1    |
|  | HEPES buffer<br>(1% DMSO, pH = 7.4)              | 340 nm/512 nm                  | 0.44 $\mu$ M | 2    |
|  | DMSO/HEPES<br>(20 mM, pH 7.22, 9:1, v/v)         | 410 nm/468 nm                  | 8.68 $\mu$ M | 3    |
|  | H <sub>2</sub> O<br>(containing 5% DMSO)         | 467 nm/517 nm                  | 10.8 $\mu$ M | 4    |

|                                                                                    |                                       |                |              |                  |
|------------------------------------------------------------------------------------|---------------------------------------|----------------|--------------|------------------|
| 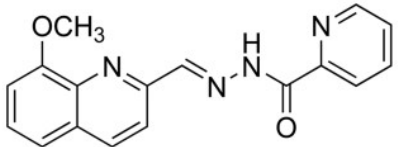  | HEPES buffered (1% DMSO, pH = 7.4)    | 340 nm/523 nm  | 0.3 $\mu$ M  | 5                |
|   | DMSO/H <sub>2</sub> O                 | 300 nm/383 nm  | 0.27 $\mu$ M | 6                |
|   | DMF/H <sub>2</sub> O                  | 386 nm/ 554 nm | 0.35 $\mu$ M | 7                |
|  | EtOH:HEPES buffer (5% EtOH, pH = 7.4) | 300 nm/380 nm  | 0.53 $\mu$ M | <b>This work</b> |

## References

1. J.-T. Yeh, W.-C. Chen, S.-R. Liu and S.-P. Wu, *New J. Chem.*, 2014, **38**, 4434.
2. L. Tang, P. Zhou, Q. Zhang, Z. Huang, J. Zhao and M. Cai, *Inorg. Chem. Commun.*, 2013, **36**, 100-104.
3. C. Gao, X. Liu, X. Jin, J. Wu, Y. Xie, W. Liu, X. Yao and Y. Tang, *Sens. Actuators, B*, 2013, **185**, 125.
4. F. Chen, F. Hou, L. Huang, J. Cheng, H. Liu, P. Xi, D. Bai and Z. Zeng, *Dyes Pigm.*, 2013, **98**, 146
5. L. Tang, P. Zhou, Z. Qi, Z. Huang, J. Zhao and M. Cai, *Bull. Korean Chem. Soc.*, 2013, **34**, 2256.
6. M. Sonawane, S.K. Sahoo, J. Singh, N. Singh, C.P. Sawant and A. Kuwar, *Inorg. Chim. Acta*, 2015, **438**, 37-41.
7. P. Torawane, S. K. Sahoo, A. Borse and A. Kuwar, *Luminescence*. 2017, **0**, 1–5.

\*\*\*\*\*
